# Supplementary material
Source: PubMed Central journal article supplement (PMC3167065)

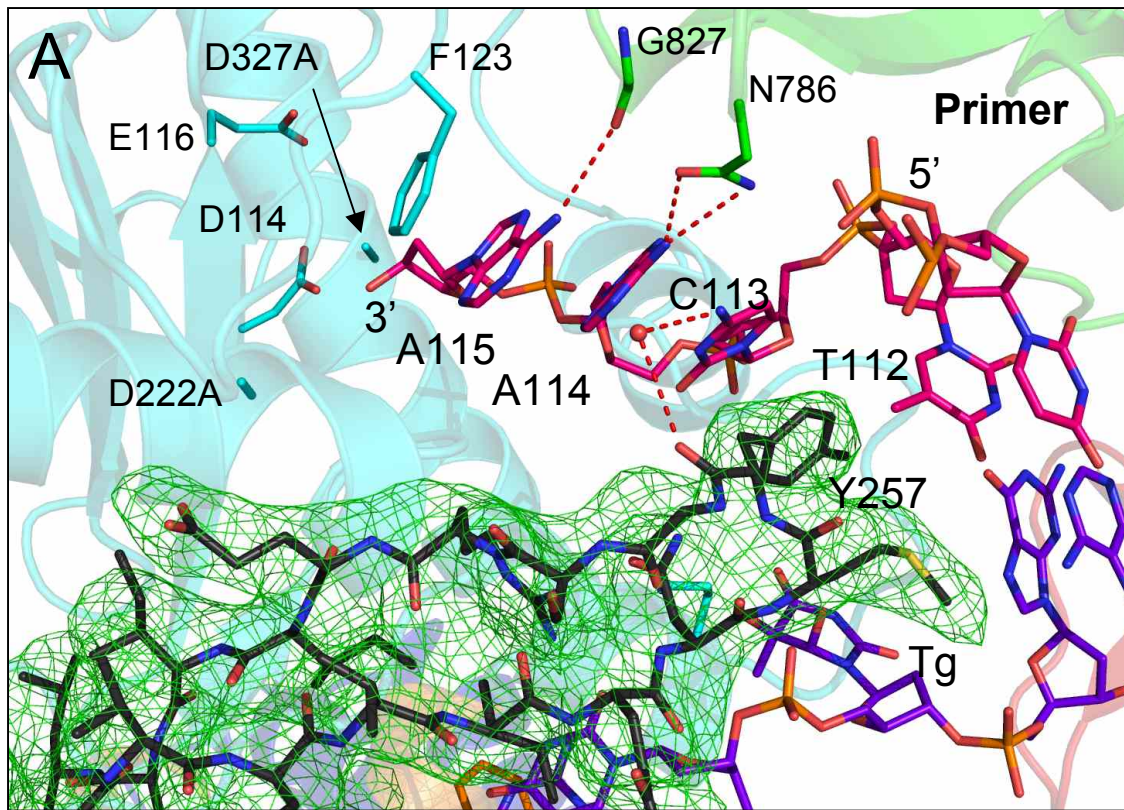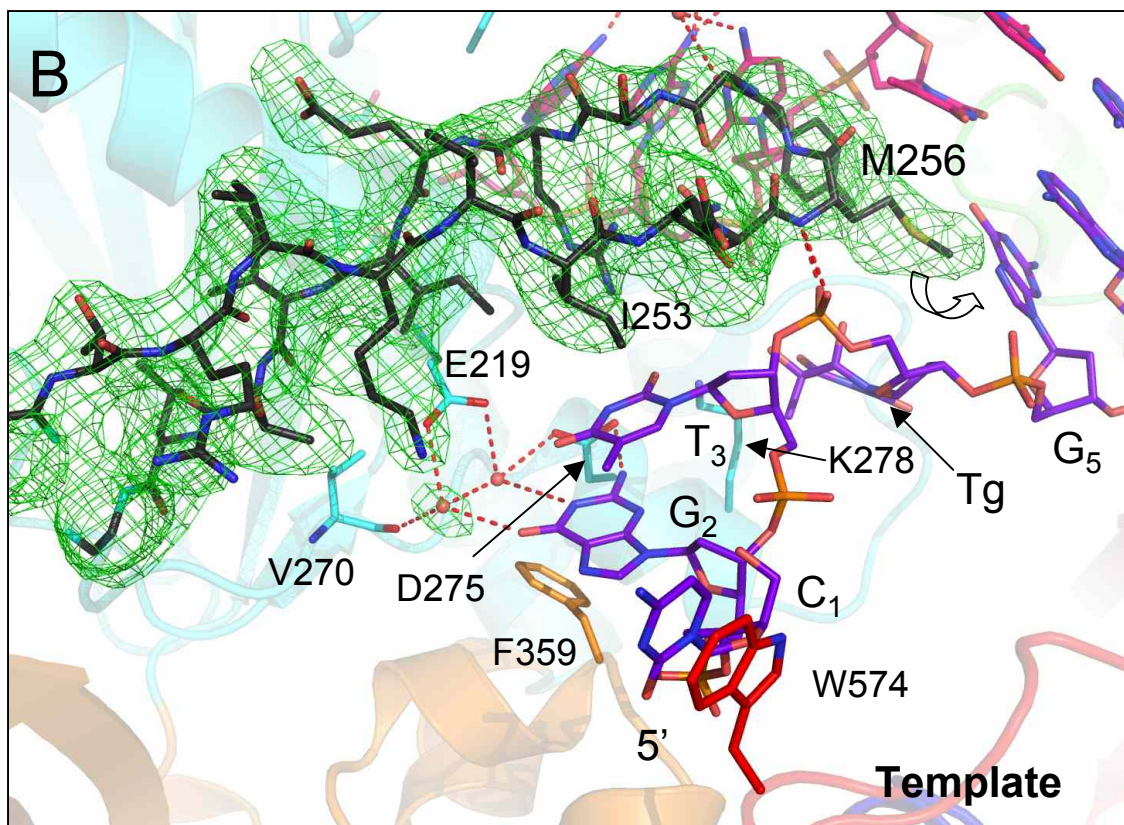

SI Figure 1

Supplement: NIHMS317541-supplement-01.pdf [file NIHMS317541-supplement-01.pdf]
